# Supplementary material for: Onsite midwife-led birth units (OMBUs) for care around the time of childbirth: a systematic review
Source: PubMed Central journal article supplement — BMJ Glob Health. 2016 Sep 2;1(2):e000096. doi: 10.1136/bmjgh-2016-000096 (PMC5321346; doi:10.1136/bmjgh-2016-000096), 2016-09-02
Supplement: bmjgh-2016-000096supp_appendix.pdf [file bmjgh-2016-000096supp_appendix.pdf]

Appendix 1 Electronic search strategy for one database (PUBMED/MEDLINE)

---

- 1 "Delivery, Obstetric"[Mesh]
  - 2 "Labor, Obstetric" [Mesh]
  - 3 "Obstetric intervention" OR "childbirth management" OR "intrapartum care"
  - 4 1 OR 2 OR 3
  - 5 "Quality Assurance, Health Care" [Mesh]
  - 6 "Experience of women" OR "Perception of women"
  - 7 5 OR 6
  - 8 "Health Expenditures" [Mesh]
  - 9 "Cost-effective"
  - 10 8 OR 9
  - 11 "Onsite midwifery unit" OR "in-hospital midwifery unit" OR "alongside midwifery unit" OR  
"midwifery birth center"
  - 12 11 AND (4 OR 7 OR 10)
-
